# Supplementary material for: Prediction of two-dimensional large-gap magnetic semiconductors in transition metal superhalogenides
Source: Royal Society of Chemistry journal article supplement (doi:10.1039/d4tc01220h), 2024-01-01
Supplement: d4tc01220h1.pdf [file d4tc01220h1.pdf]

**Supporting Information for**  
**Prediction of Two-dimensional Large-gap Magnetic Semiconductors in**  
**Transition Metal Superhalogenides**

Jing Wang<sup>1</sup>, Yuzhen Liu<sup>1,\*</sup>, Ruifeng Lu<sup>1</sup>, Ziyang Qu<sup>1</sup>, Ang Li<sup>1</sup>, Yi Wan<sup>1</sup>,

Chengxi Huang<sup>1,\*</sup>

<sup>1</sup> *MIIT Key Laboratory of Semiconductor Microstructure and Quantum Sensing, and  
Department of Applied Physics, Nanjing University of Science and Technology,  
Nanjing 210094, People's Republic of China*

★Correspondence and requests for materials should be addressed to

C. H. (email: [chuang@njust.edu.cn](mailto:chuang@njust.edu.cn)), Y. L. (email: [yzliu@njust.edu.cn](mailto:yzliu@njust.edu.cn))

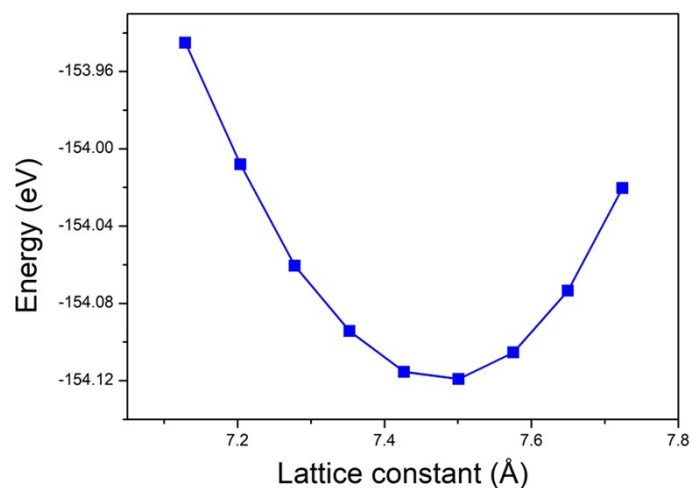

**Fig. S1.** Total energy as a function of lattice constants for  $\text{Co}[\text{B}(\text{CN})_4]_2$  monolayer.

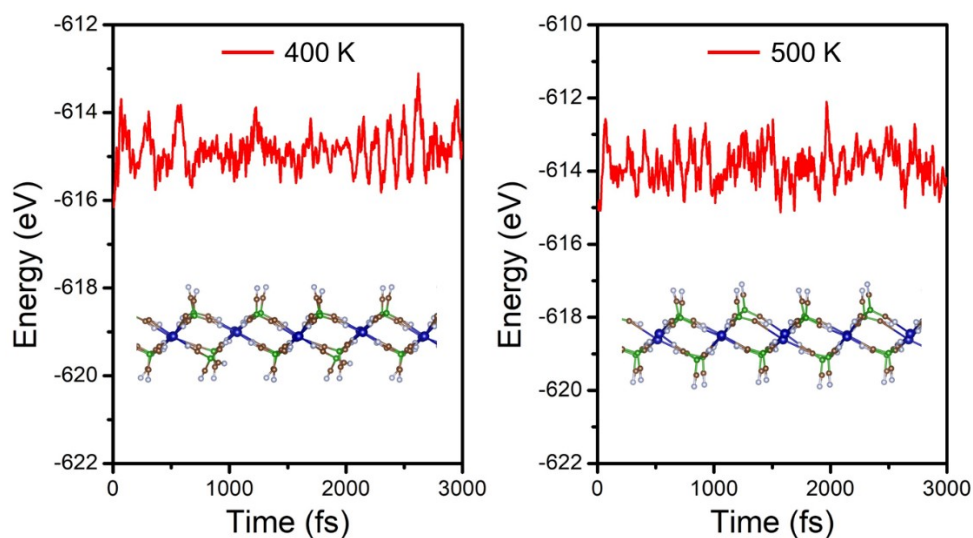

**Fig. S2.** Fluctuation of the total energy during the molecular dynamical simulation process at 400 and 500 K. Inset: Side view of  $\text{Co}[\text{B}(\text{CN})_4]_2$  monolayer after a simulation time of 3000 fs.

We have also further performed AIMD simulations at 800 K. The results show that the bonds between  $\text{B}(\text{CN})_4$  and Co atoms are broken and the atomic structural framework is destroyed during the simulation process. Therefore, the  $\text{Co}[\text{B}(\text{CN})_4]_2$  monolayer may not survive at a high temperature of 800 K, but could be stable at a temperature up to 500 K.

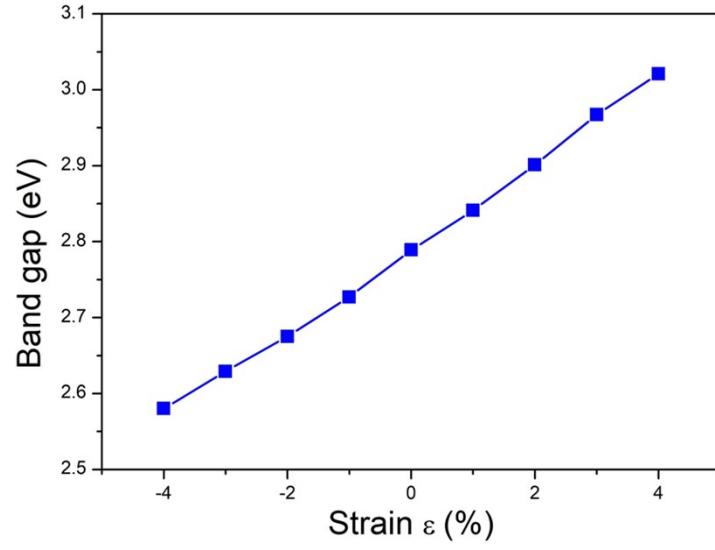

**Fig. S3.** Electronic band gap as a function of in-plane biaxial strain for the  $\text{Co}[\text{B}(\text{CN})_4]_2$  monolayer calculated by PBE+U (3 eV) method.

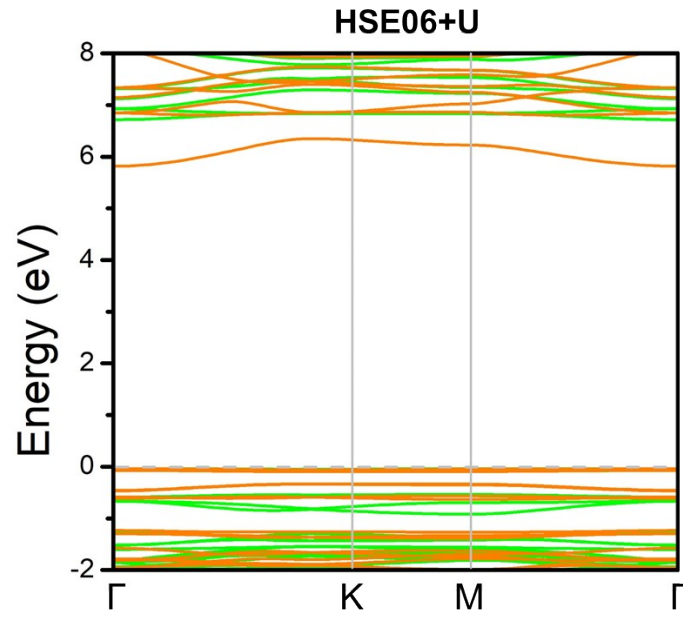

**Fig. S4.** Electronic band structure of  $\text{Co}[\text{B}(\text{CN})_4]_2$  monolayer calculated by HSE06+U method. Green and orange profiles represent spin-up and -down bands, respectively.

**Table S1.** The electronic band gap ( $G$ ), total magnetic moment per unitcell ( $M_{\text{tot}}$ ), magnetic exchange energy ( $E_{\text{ex}} = E_{\text{AFM}} - E_{\text{FM}}$ ) and estimated Curie temperature ( $T_{\text{C}}$ ) for  $\text{Co}[\text{B}(\text{CN})_4]_2$  monolayer calculated by different methods.

| Method      | G (eV) | $M_{\text{tot}}$ ( $\mu_B$ ) | $E_{\text{ex}}$ (meV) |
|-------------|--------|------------------------------|-----------------------|
| PBE         | 0.51   | 3                            | 12.7                  |
| PBE+U(1 eV) | 1.22   | 3                            | 15.5                  |
| PBE+U(2 eV) | 2.03   | 3                            | 17.3                  |
| PBE+U(3 eV) | 2.78   | 3                            | 19.2                  |
| PBE+U(4 eV) | 3.49   | 3                            | 20.7                  |
| HSE06       | 4.18   | 3                            |                       |
